# Supplementary material for: Antitumor Efficacy of the Herbal Recipe Benja Amarit against Highly Invasive Cholangiocarcinoma by Inducing Apoptosis both In Vitro and In Vivo
Source: MDPI journal article supplement (doi:10.3390/ijms21165669), 2020-08-07
Supplement: s1 [file s1]

## Supplementary Information

**Table S1.** The half maximal inhibitory concentration (IC<sub>50</sub>) and 50% hemolysis (HC<sub>50</sub>) of BJA-95 on normal cells compared with KKU-213 cell.

| Cell type                    | Cell lines                                 | IC <sub>50</sub> (μg/ml) |
|------------------------------|--------------------------------------------|--------------------------|
| Cholangiocarcinoma cell      | KKU-213                                    | 7.1±1.3                  |
| Normal cholangiocyte         | MMNK-1                                     | 10.5±1.6*                |
| Human breast epithelial cell | MCF-10A                                    | 16.1±1.4**               |
| Fibroblast cell              | 3T3-L1                                     | 11.6±1.1*                |
| Blood cell                   | Peripheral blood mononuclear cells (PBMCs) | 13.8±1.7**               |
|                              |                                            | HC <sub>50</sub> (mg/ml) |
| Blood cell                   | Red blood cells (RBCs)                     | 0.5±0.1****              |

Notes: Results are shown as mean ± SD from repeated three independent experiments for KKU-213 and MMNK-1 cell lines. The IC<sub>50</sub> and HC<sub>50</sub> on MCF-10A, 3T3-L1, PBMCs and RBCs were referred from our previous study <sup>19</sup>. (\*)  $p < 0.05$ , (\*\*)  $p < 0.01$ , (\*\*\*)  $p < 0.001$ , (\*\*\*\*)  $p < 0.0001$  significantly higher than the value of KKU-213 cells.

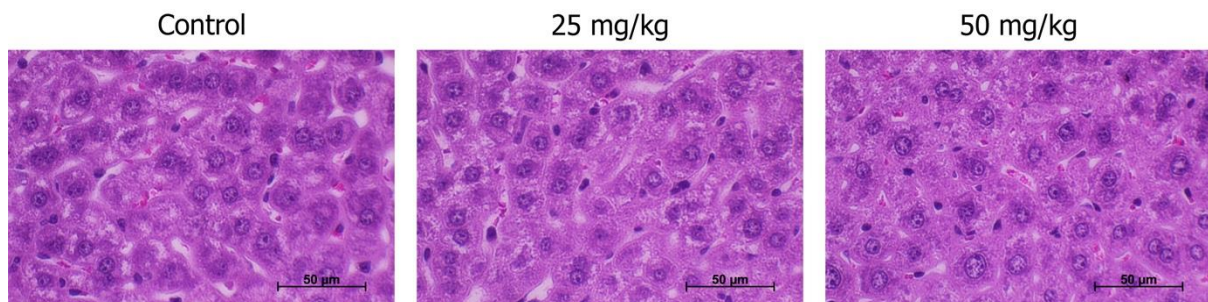

**Figure S1.** Representative photos of hematoxylin and eosin (H&E) staining of liver tissues. The BJA-95 treatment showed no discernible toxicity on mice liver cells.
